# Supplementary material for: Genomic Insights into a Colistin-Resistant Uropathogenic Escherichia coli Strain of O23:H4-ST641 Lineage Harboring mcr-1.1 on a Conjugative IncHI2 Plasmid from Egypt
Source: PubMed Central journal article supplement (PMC8069611; doi:10.3390/microorganisms9040799), 2021-04-10
Supplement: microorganisms-09-00799-s001.pdf [file microorganisms-09-00799-s001.pdf]

**Supplementary Table S1:** Antimicrobial resistance profile for 67 *E. coli* strains isolated from urinary tract infections where blue boxes represent resistance and white boxes indicate susceptibility to the corresponding antimicrobial disk.

| Isolate Code | AMC 30 | CTX 30 | CAZ 30 | FEP 30 | CIP 5 | LEV 5 | SXT 25 | CN 10 | DO 30 | IPM 10 | MEM 10 | CT 10 |
|--------------|--------|--------|--------|--------|-------|-------|--------|-------|-------|--------|--------|-------|
| EC11377      | Blue   | Blue   | Blue   | Blue   | Blue  | Blue  | White  | Blue  | White | Blue   | White  | White |
| EC11998      | Blue   | Blue   | Blue   | Blue   | Blue  | Blue  | White  | Blue  | Blue  | Blue   | White  | White |
| EC12665      | Blue   | Blue   | Blue   | Blue   | Blue  | Blue  | White  | Blue  | White | Blue   | White  | White |
| EC11994      | Blue   | Blue   | Blue   | Blue   | Blue  | Blue  | Blue   | White | Blue  | White  | White  | White |
| EC11856      | Blue   | Blue   | Blue   | Blue   | Blue  | Blue  | White  | White | Blue  | Blue   | White  | White |
| EC11804      | Blue   | Blue   | Blue   | Blue   | Blue  | Blue  | White  | White | White | White  | White  | White |
| EC12220      | Blue   | Blue   | Blue   | Blue   | Blue  | Blue  | Blue   | Blue  | Blue  | Blue   | White  | White |
| EC11443      | Blue   | Blue   | Blue   | Blue   | Blue  | Blue  | White  | Blue  | Blue  | Blue   | Blue   | Blue  |
| EC11322      | Blue   | Blue   | Blue   | Blue   | Blue  | Blue  | Blue   | White | Blue  | Blue   | White  | White |
| EC11442      | Blue   | Blue   | Blue   | Blue   | Blue  | Blue  | White  | Blue  | White | White  | White  | White |
| EC11376      | Blue   | Blue   | Blue   | Blue   | Blue  | Blue  | White  | White | White | Blue   | White  | White |
| EC12181      | Blue   | Blue   | Blue   | Blue   | Blue  | Blue  | Blue   | White | White | Blue   | White  | White |
| EC11997      | Blue   | Blue   | Blue   | Blue   | Blue  | Blue  | White  | Blue  | Blue  | Blue   | White  | Blue  |
| EC11384      | Blue   | Blue   | Blue   | Blue   | Blue  | Blue  | Blue   | White | White | Blue   | White  | White |
| EC11302      | Blue   | Blue   | Blue   | Blue   | Blue  | Blue  | White  | Blue  | White | Blue   | White  | White |
| EC2031       | Blue   | Blue   | Blue   | Blue   | Blue  | Blue  | White  | White | White | White  | White  | White |
| EC11868      | Blue   | Blue   | Blue   | Blue   | Blue  | Blue  | White  | Blue  | Blue  | Blue   | White  | White |
| EC13070      | Blue   | Blue   | Blue   | Blue   | Blue  | Blue  | Blue   | White | Blue  | Blue   | White  | White |
| EC12911      | Blue   | Blue   | Blue   | Blue   | Blue  | Blue  | Blue   | White | Blue  | Blue   | White  | White |
| EC12946      | Blue   | Blue   | Blue   | Blue   | Blue  | Blue  | White  | White | Blue  | Blue   | Blue   | White |
| EC12947      | Blue   | Blue   | Blue   | Blue   | Blue  | Blue  | White  | White | Blue  | Blue   | White  | White |
| EC13049      | Blue   | Blue   | Blue   | Blue   | Blue  | Blue  | Blue   | Blue  | Blue  | White  | White  | Blue  |
| EC13205      | Blue   | Blue   | Blue   | Blue   | Blue  | Blue  | White  | Blue  | Blue  | Blue   | White  | White |
| EC12825      | Blue   | Blue   | Blue   | Blue   | Blue  | Blue  | White  | Blue  | Blue  | Blue   | Blue   | White |
| EC12758      | Blue   | Blue   | Blue   | Blue   | Blue  | Blue  | White  | Blue  | White | Blue   | White  | White |
| EC12665      | Blue   | Blue   | Blue   | Blue   | Blue  | Blue  | Blue   | Blue  | Blue  | Blue   | White  | White |
| EC15635      | Blue   | Blue   | Blue   | Blue   | White | White | White  | White | White | White  | White  | White |
| EC12693      | Blue   | Blue   | Blue   | Blue   | Blue  | Blue  | Blue   | Blue  | Blue  | Blue   | White  | White |
| EC15984      | Blue   | Blue   | Blue   | Blue   | Blue  | Blue  | White  | Blue  | White | Blue   | White  | White |
| EC16073      | Blue   | Blue   | Blue   | Blue   | Blue  | Blue  | Blue   | White | White | Blue   | White  | White |
| EC12638      | Blue   | Blue   | Blue   | Blue   | White | White | White  | White | White | Blue   | White  | White |
| EC12572      | Blue   | Blue   | Blue   | Blue   | Blue  | Blue  | White  | Blue  | White | Blue   | White  | White |
| EC13213      | Blue   | Blue   | Blue   | Blue   | White | White | White  | White | White | Blue   | White  | White |
| EC12330      | Blue   | Blue   | Blue   | Blue   | Blue  | Blue  | Blue   | White | White | Blue   | White  | White |
| EC12319      | Blue   | Blue   | Blue   | Blue   | White | White | White  | White | White | Blue   | White  | White |
| EC14051      | Blue   | Blue   | Blue   | Blue   | Blue  | Blue  | Blue   | Blue  | Blue  | Blue   | White  | White |
| EC16585      | Blue   | Blue   | Blue   | Blue   | Blue  | Blue  | White  | Blue  | White | Blue   | Blue   | Blue  |
| EC13495      | Blue   | Blue   | Blue   | Blue   | Blue  | Blue  | Blue   | Blue  | Blue  | Blue   | Blue   | White |
| EC14657      | Blue   | Blue   | Blue   | Blue   | Blue  | Blue  | Blue   | Blue  | Blue  | Blue   | White  | White |
| EC13933      | Blue   | Blue   | Blue   | Blue   | Blue  | Blue  | Blue   | Blue  | Blue  | Blue   | White  | White |
| EC13791      | Blue   | Blue   | Blue   | Blue   | Blue  | Blue  | Blue   | Blue  | Blue  | Blue   | White  | White |
| EC14437      | Blue   | Blue   | Blue   | Blue   | Blue  | Blue  | Blue   | White | White | White  | White  | White |
| EC16726      | Blue   | Blue   | Blue   | Blue   | Blue  | Blue  | White  | Blue  | White | Blue   | White  | White |
| EC13728      | Blue   | Blue   | Blue   | Blue   | Blue  | Blue  | Blue   | White | Blue  | White  | White  | White |

|         |  |  |  |  |  |  |  |  |  |  |  |  |
|---------|--|--|--|--|--|--|--|--|--|--|--|--|
| EC14142 |  |  |  |  |  |  |  |  |  |  |  |  |
| EC13655 |  |  |  |  |  |  |  |  |  |  |  |  |
| EC13653 |  |  |  |  |  |  |  |  |  |  |  |  |
| EC13325 |  |  |  |  |  |  |  |  |  |  |  |  |
| EC13337 |  |  |  |  |  |  |  |  |  |  |  |  |
| EC13502 |  |  |  |  |  |  |  |  |  |  |  |  |
| EC14087 |  |  |  |  |  |  |  |  |  |  |  |  |
| EC14439 |  |  |  |  |  |  |  |  |  |  |  |  |
| EC13856 |  |  |  |  |  |  |  |  |  |  |  |  |
| EC13798 |  |  |  |  |  |  |  |  |  |  |  |  |
| EC14734 |  |  |  |  |  |  |  |  |  |  |  |  |
| EC16342 |  |  |  |  |  |  |  |  |  |  |  |  |
| EC14868 |  |  |  |  |  |  |  |  |  |  |  |  |
| EC14866 |  |  |  |  |  |  |  |  |  |  |  |  |
| EC14636 |  |  |  |  |  |  |  |  |  |  |  |  |
| EC13589 |  |  |  |  |  |  |  |  |  |  |  |  |
| EC14614 |  |  |  |  |  |  |  |  |  |  |  |  |
| EC14149 |  |  |  |  |  |  |  |  |  |  |  |  |
| EC16578 |  |  |  |  |  |  |  |  |  |  |  |  |
| EC14721 |  |  |  |  |  |  |  |  |  |  |  |  |
| EC16574 |  |  |  |  |  |  |  |  |  |  |  |  |
| EC16710 |  |  |  |  |  |  |  |  |  |  |  |  |
| EC16712 |  |  |  |  |  |  |  |  |  |  |  |  |

AMC: amoxicillin-clavulanate; CTX: cefotaxime; CAZ: ceftazidime; FEP: cefepime; CIP, ciprofloxacin; LEV: levofloxacin; SXT: trimethoprim-sulfamethoxazole; CN: gentamicin; DO: doxycycline; IPM: imipenem; MEM: meropenem; CT: colistin.

**Supplementary Table S2:** Assembly statistics generated through WGS of *E. coli* strain EC13049.

|                           |           |
|---------------------------|-----------|
| Depth of coverage         | 198x      |
| Genome breadth (%)        | 99.8      |
| Number of reads           | 4,947,285 |
| Total length of sequences | 5,553,206 |
| Total number of contigs   | 300       |
| N50 (bp)                  | 69479     |
| GC (%)                    | 52.4      |
| CDSs                      | 4,883     |
| 5s, 16s, 23rrna           | 1, 1, 1   |
